# Supplementary material for: Photophysical properties of rhenium(i) complexes and photosensitized generation of singlet oxygen
Source: Royal Society of Chemistry journal article supplement (doi:10.1039/c6pp00364h), 2016-12-13
Supplement: c6pp00364h1.pdf [file c6pp00364h1.pdf]

# Photophysical properties of rhenium(I) complexes and photosensitized generation of singlet oxygen

Luiz Duarte Ramos, Hugo Moreira da Cruz, Karina P. Morelli Frin\*

Universidade Federal do ABC - UFABC, Av. dos Estados 5001, Santo Andre-SP – Brazil - 09210-170.

\*Email: [karina.frin@ufabc.edu.br](mailto:karina.frin@ufabc.edu.br)

## Electronic Supporting Information

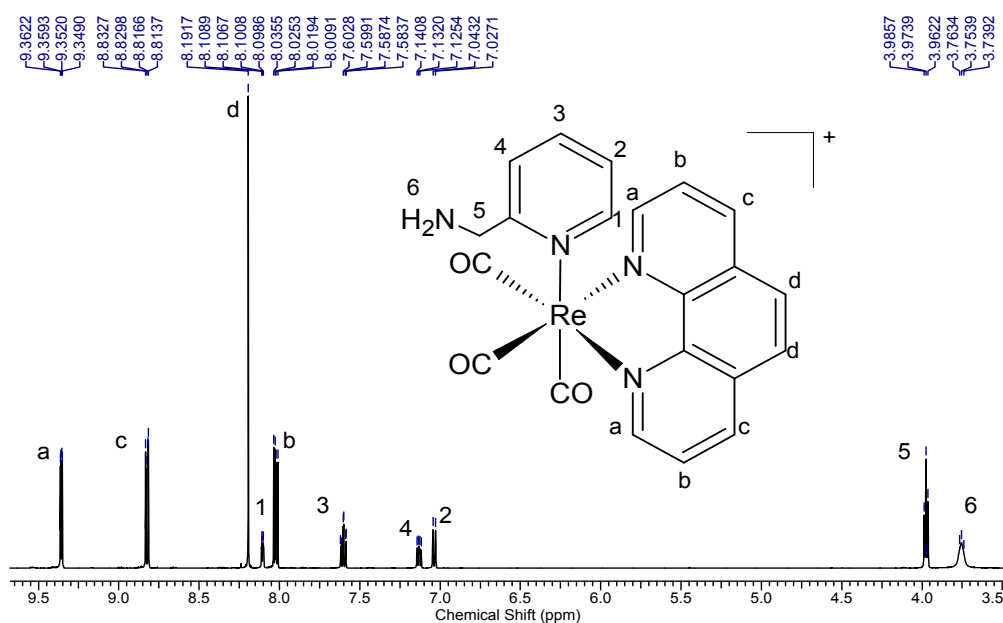

**Figure 1S:**  $^1\text{H}$  NMR spectrum of  $\text{fac-}[\text{Re}(\text{CO})_3(\text{phen})(\text{ampy})]^+$  in  $\text{CD}_3\text{CN}$  at  $25^\circ\text{C}$  (500MHz).

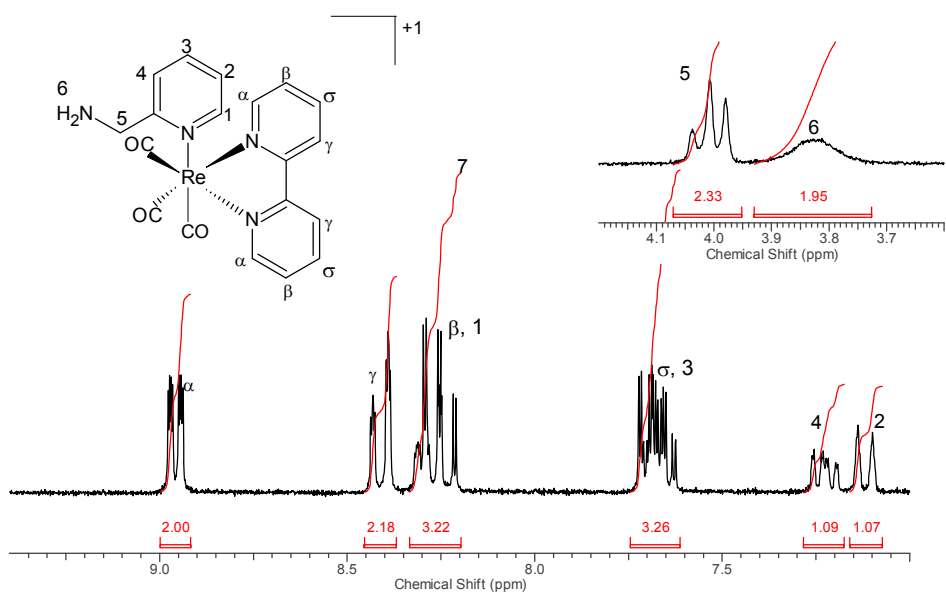

**Figure 2S:**  $^1\text{H}$  NMR spectrum of  $\text{fac-}[\text{Re}(\text{CO})_3(\text{bpy})(\text{ampy})]^+$  in  $\text{CD}_3\text{CN}$  at  $25^\circ\text{C}$  (200MHz).

**Table 1S:** <sup>1</sup>H NMR spectral data for rhenium(I) complexes and ligands.

| Compound                                                                            | Proton                                                                                                                                   | $\delta$ (ppm)                                                               | J (Hz)                                                                                 | ref |
|-------------------------------------------------------------------------------------|------------------------------------------------------------------------------------------------------------------------------------------|------------------------------------------------------------------------------|----------------------------------------------------------------------------------------|-----|
| 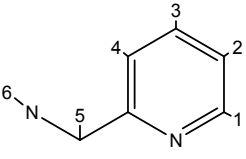   | H1<br>H2<br>H3<br>H4<br>H5<br>H6                                                                                                         | 8.3<br>7.2<br>7.8<br>7.3<br>3.7                                              |                                                                                        | 1   |
|    | H $\alpha$<br>H $\beta$<br>H $\gamma$<br>H $\delta$                                                                                      | 9.14<br>7.52<br>8.10<br>7.62                                                 |                                                                                        | 2   |
|    | H $\alpha$ (d)<br>H $\gamma$ (d)<br>H $\beta$ (t)<br>H $\sigma$ (t)                                                                      | 8.65<br>8.40<br>7.23<br>7.74                                                 |                                                                                        |     |
|   | H $\alpha$ (dd)<br>H $\beta$ (dd)<br>H $\gamma$ (dd)<br>H $\delta$ (s)<br>H1 (dd)<br>H2 (dd)<br>H3 (td)<br>H4 (d)<br>H5 (t)<br>H6 (band) | 9.35<br>8.02<br>8.82<br>8.25<br>8.10<br>7.13<br>7.60<br>7.03<br>3.97<br>3.75 | 5.0; 1.5<br>8.2; 5.0<br>8.2; 1.5<br><br>5.0; 1.5<br>5.0; 7.5<br>7.5; 2.0<br>7.5<br>6.0 |     |
|  | H $\alpha$ (d)<br>H $\gamma$ (d)<br>H $\beta$ ,1 (m)<br>H $\sigma$ ,H3 (m)<br>H2 (t)<br>H4 (d)<br>H5 (t)<br>H6 (band)                    | 8.95<br>8.41<br>8.27<br>7.68<br>7.13<br>7.48<br>4.01<br>3.83                 | 5.5<br>8.3<br><br>1.2; 6.7<br>7.8<br>5.8<br>-                                          |     |

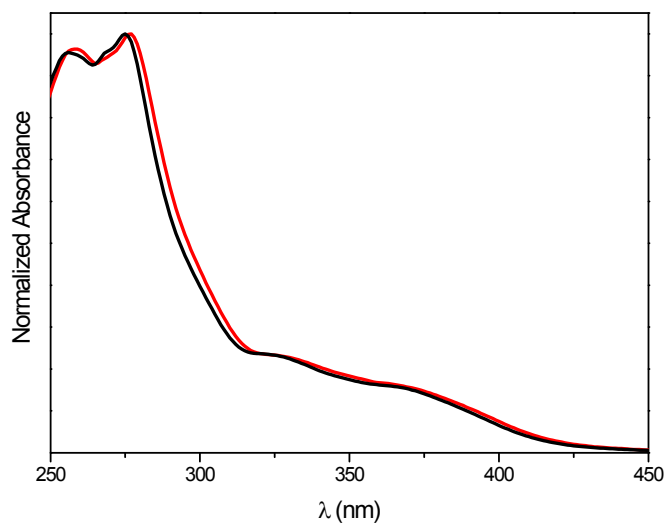

**Figure 3S.** UV-Vis spectra of  $fac-[Re(ampy)(CO)_3(phen)]^+$  in  $CH_3CN$  (—) and in PMMA (—) at 25 °C.

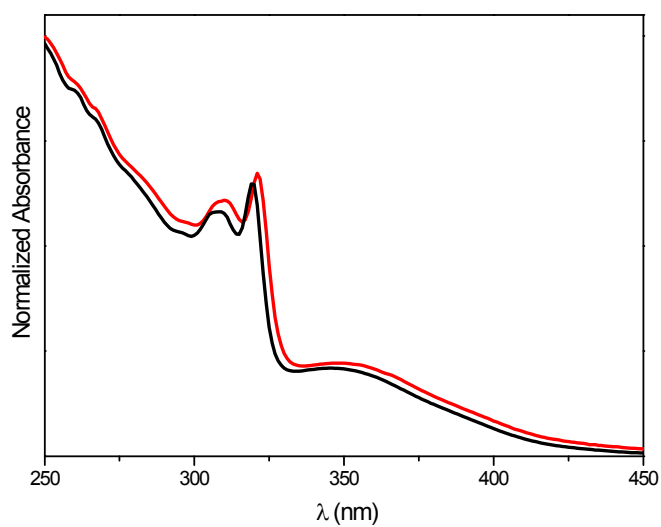

**Figure 4S.** UV-Vis spectra of  $fac-[Re(ampy)(CO)_3(bpy)]^+$  in  $CH_3CN$  (—) and in PMMA (—) at 25 °C.

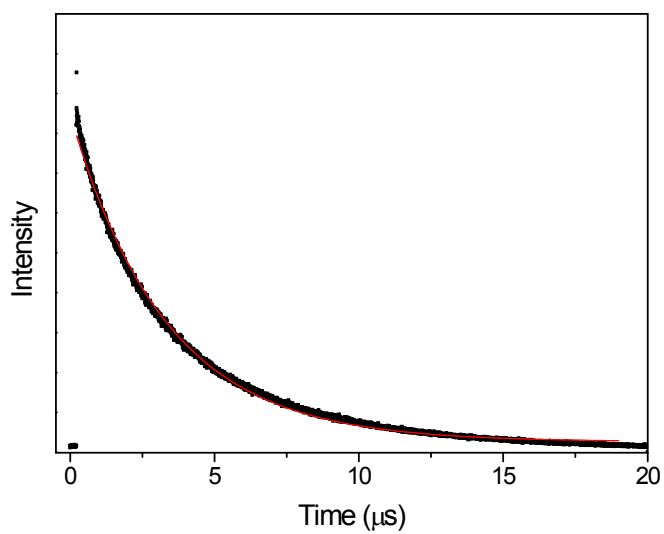

**Figure 5S:** Time-resolved decay curves of  $fac-[Re(ampy)(CO)_3(phen)]^+$  (probed at maxima wavelength after 375 nm laser excitation in PMMA at 298 K).

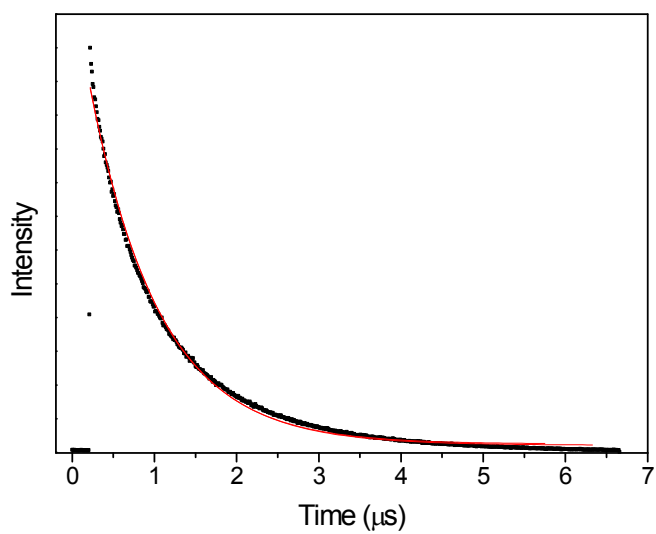

**Figure 6S:** Time-resolved decay curves of  $fac-[Re(ampy)(CO)_3(bpy)]^+$  probed at maxima wavelength after 375 nm laser excitation in PMMA at 298 K.

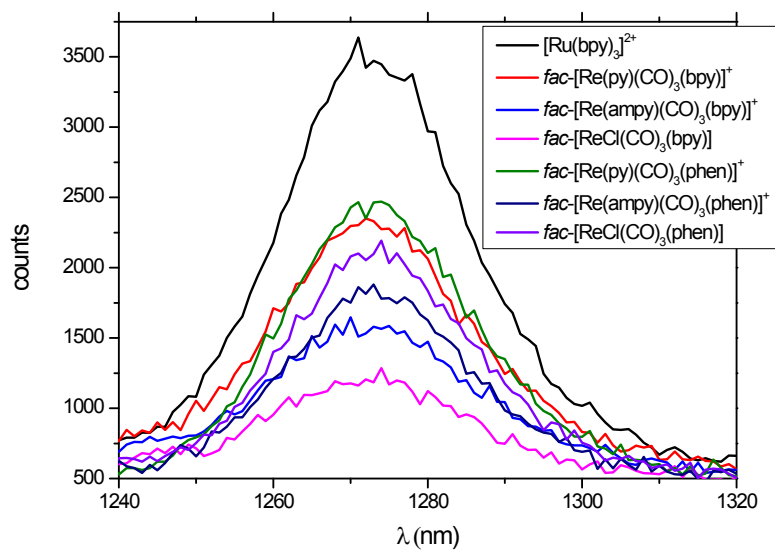

**Figure 7S:** Sensitized  $O_2$  ( $^1\Delta_g$ ) emission spectra generated by using rhenium(I) complexes after 375 nm laser excitation in  $CH_3CN$  at 298 K.

## References

1. L. Agüero, L. G. Guerrero-Ramirez and I. Katime, *Mater. Sci. Appl.*, 2010, **1**, 103-108.
2. A. J. Dekoning, P. H. M. Budzelaar, J. Boersma and G. J. M. Vanderkerk, *Journal of Organometallic Chemistry*, 1980, **199**, 153-169.
